# Supplementary material for: One-dimensional CdS@Cd0.5Zn0.5S@ZnS-Ni(OH)2 nano-hybrids with epitaxial heterointerfaces and spatially separated photo-redox sites enabling highly-efficient visible-light-driven H2 evolution
Source: Royal Society of Chemistry journal article supplement (doi:10.1039/d0nr04007j), 2020-01-01
Supplement: d0nr04007j1.pdf [file d0nr04007j1.pdf]

One-dimensional  $\text{CdS@Cd}_{0.5}\text{Zn}_{0.5}\text{S@ZnS-Ni(OH)}_2$  nano-hybrids with epitaxial heterointerfaces and spatially separated photo-redox sites enabling highly-efficient visible-light-driven  $\text{H}_2$  evolution

Qinqin Ruan,<sup>a,†</sup> Xiaowei Ma,<sup>a,b,†</sup> Yanyan Li,<sup>\*a</sup> Jiakun Wu,<sup>a</sup> Zhiyang Wang,<sup>c</sup> Yanling Geng,<sup>a</sup> Wenjing Wang,<sup>a</sup> Haifeng Lin<sup>\*a</sup> and Lei Wang<sup>a</sup>

<sup>a</sup> Taishan Scholar Advantage and Characteristic Discipline Team of Eco Chemical Process and Technology, Key Laboratory of Eco-chemical Engineering, College of Chemistry and Molecular Engineering, Qingdao University of Science and Technology, Qingdao 266042, P. R. China

<sup>b</sup> College of Materials Science and Engineering, Liaocheng University, No. 1 Hunan Road, Liaocheng 252059, P. R. China

<sup>c</sup> Key Laboratory of Design and Assembly of Functional Nanostructures, Fujian Institute of Research on the Structure of Matter, Chinese Academy of Sciences, Fujian 350002, P. R. China

† These authors contributed equally to this work.

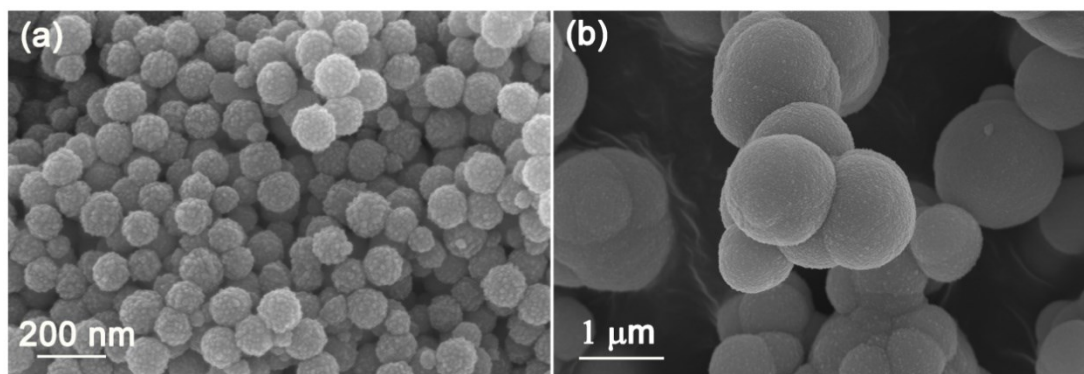

**Fig. S1.** SEM images of (a)  $\text{Cd}_{0.5}\text{Zn}_{0.5}\text{S}$  and (b)  $\text{ZnS}$  assembled nano-spheres.

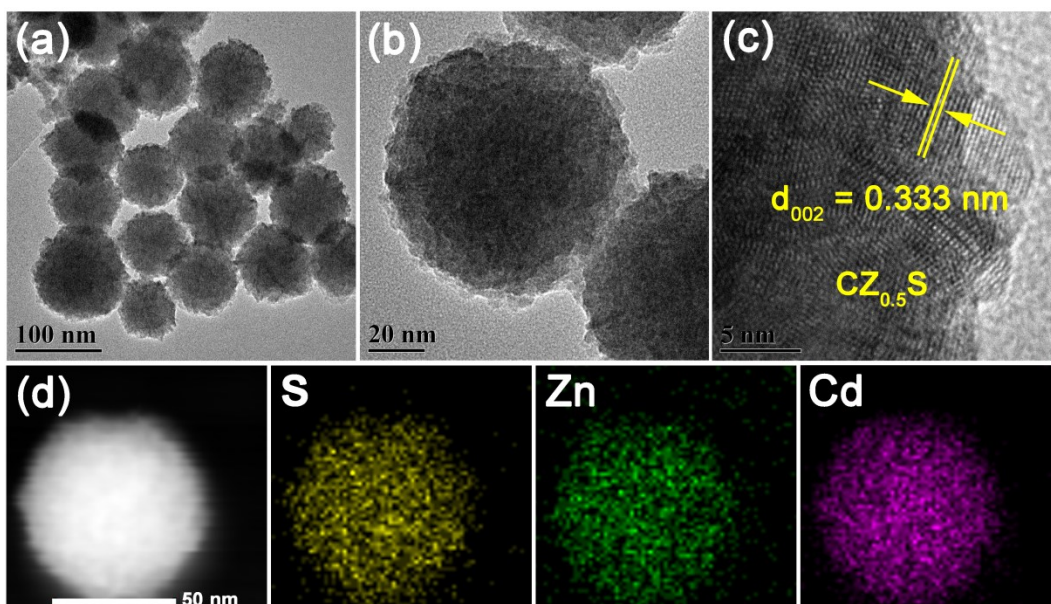

**Fig. S2.** (a, b) TEM, (c) HRTEM, and (d) dark-field STEM and EDX elemental mapping graphs of  $\text{CZ}_{0.5}\text{S}$  assembled nano-spheres.

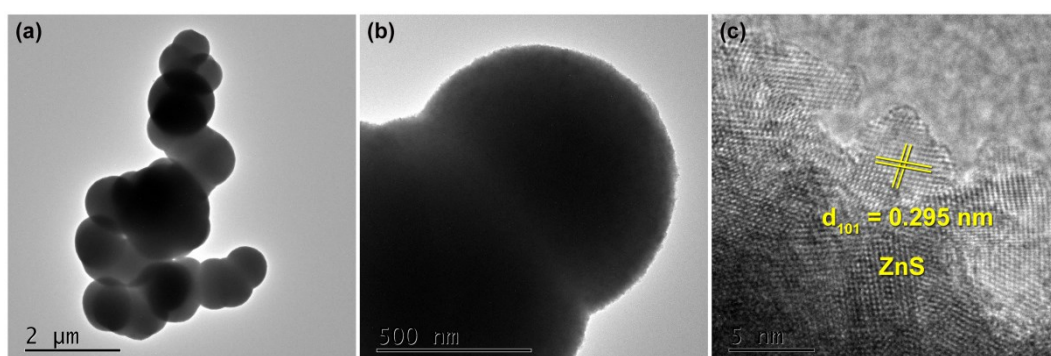

**Fig. S3.** (a, b) TEM and (c) HRTEM images of  $\text{ZnS}$  assembled nano-spheres.

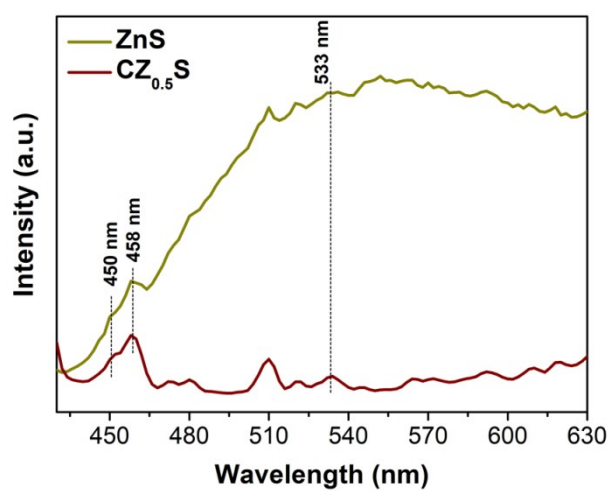

**Fig. S4.** PL spectra of  $\text{CZ}_{0.5}\text{S}$  and  $\text{ZnS}$  nano-spheres.

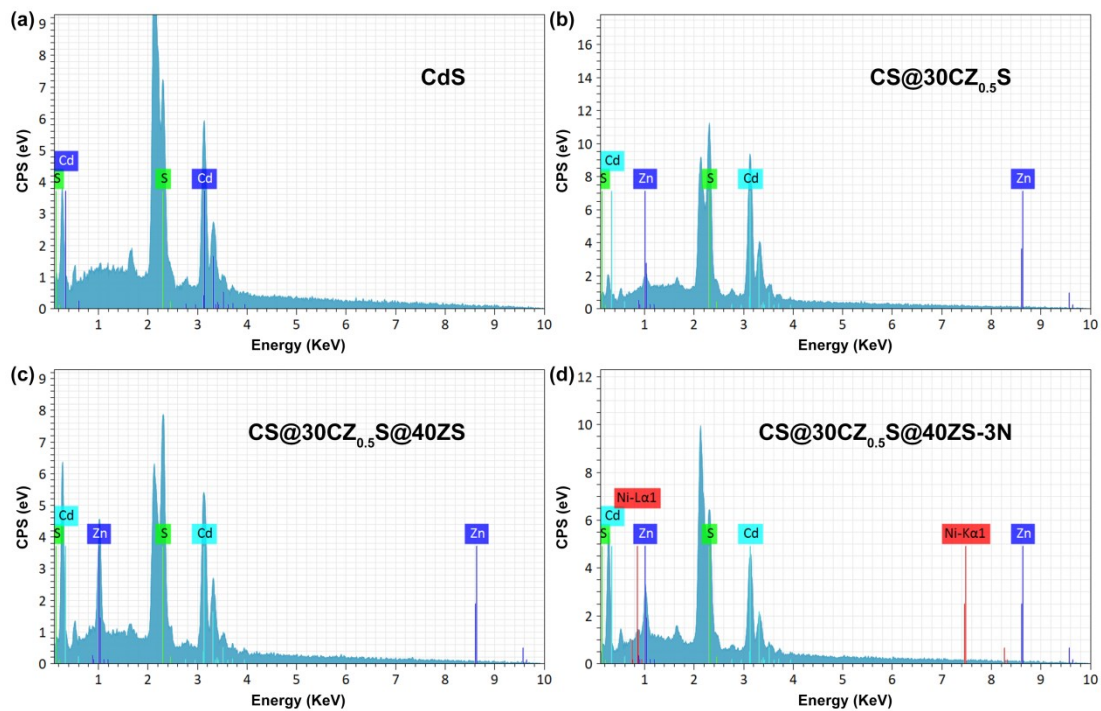

**Fig. S5.** EDX spectra of (a) CdS, (b) CS@30CZ<sub>0.5</sub>S, (c) CS@30CZ<sub>0.5</sub>S@40ZS, and (d) CS@30CZ<sub>0.5</sub>S@40ZS-3N.

**Table S1.** The composition of samples determined by EDX measurement.

| Catalyst                         | Cd (at. %) | Zn (at. %) | S (at. %) | Ni (at. %) |
|----------------------------------|------------|------------|-----------|------------|
| CdS                              | 48.21      | -          | 51.79     | -          |
| CS@30CZ <sub>0.5</sub> S         | 45.32      | 3.71       | 50.97     | -          |
| CS@30CZ <sub>0.5</sub> S@40ZS    | 34.15      | 15.32      | 50.53     | -          |
| CS@30CZ <sub>0.5</sub> S@40ZS-3N | 35.54      | 12.67      | 50.22     | 1.57       |

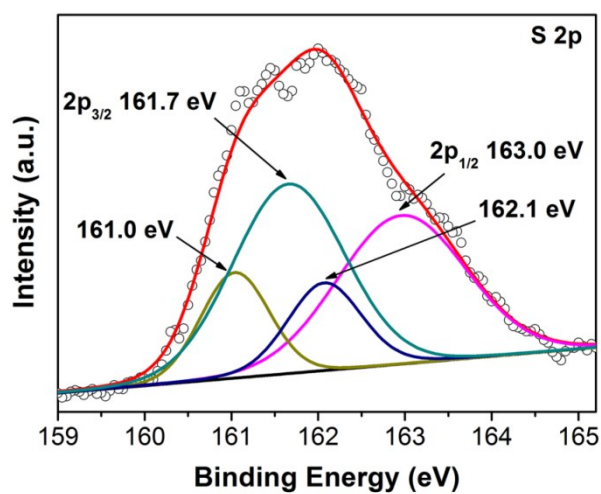

**Fig. S6.** S 2p XPS spectrum of the CS@30CZ<sub>0.5</sub>S@40ZS-3N hybrid.

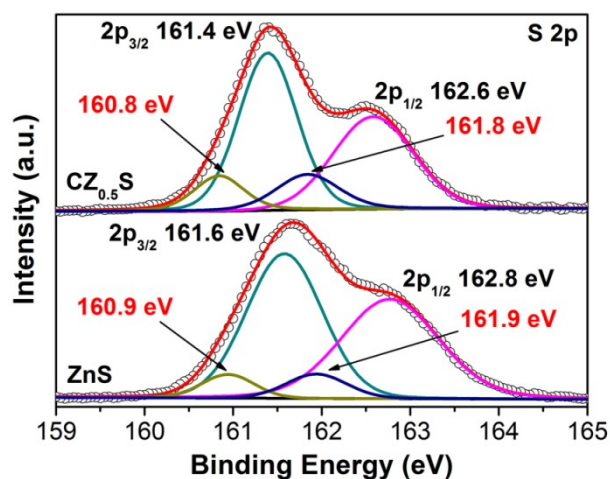

Fig. S7. S 2p XPS spectra of the CZ<sub>0.5</sub>S and ZnS nano-spheres.

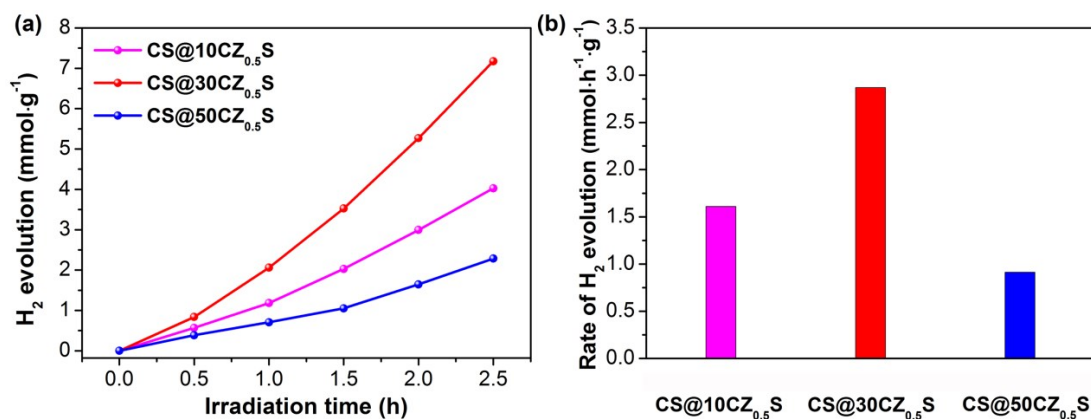

Fig. S8. (a) Photocatalytic HER activities and (b) corresponding rates of the CdS@CZ<sub>0.5</sub>S composites with different CZ<sub>0.5</sub>S contents.

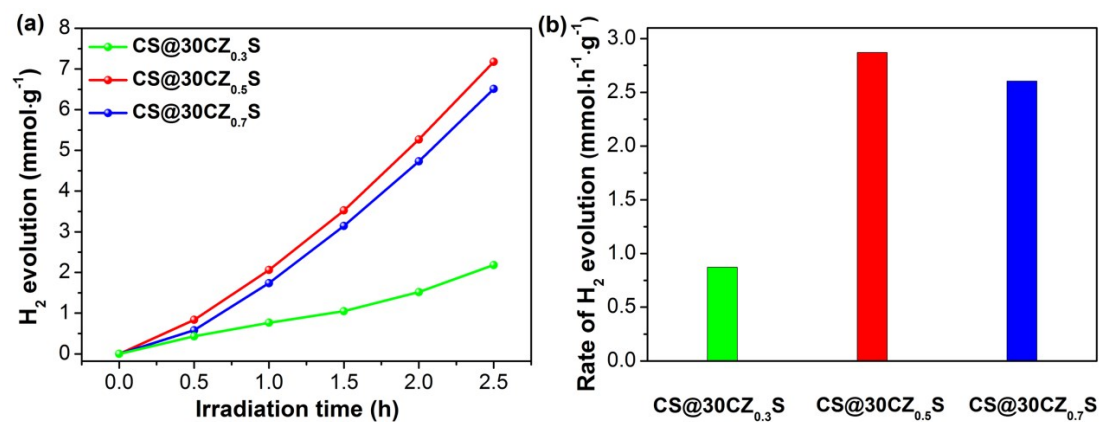

Fig. S9. (a) Photocatalytic H<sub>2</sub> evolution activities and (b) corresponding rates of the CdS@30 wt%Cd<sub>1-x</sub>Zn<sub>x</sub>S with varying Zn ratios in Cd<sub>1-x</sub>Zn<sub>x</sub>S.

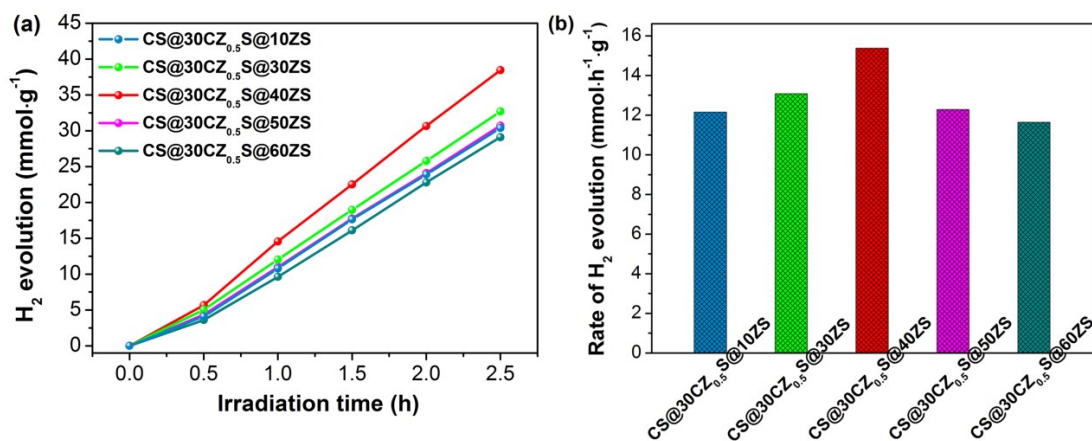

**Fig. S10.** (a) Photocatalytic HER activities of (b) corresponding rates of the CS@30CZ<sub>0.5</sub>S@ZnS containing different ZnS loading amounts.

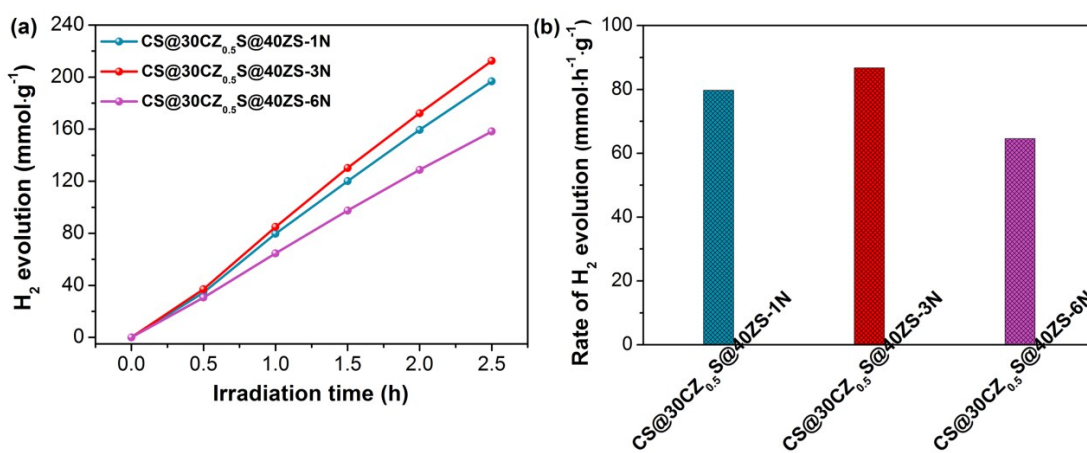

**Fig. S11.** (a) Photocatalytic HER activities and (b) corresponding rates of the CS@30CZ<sub>0.5</sub>S@40ZS-Ni(OH)<sub>2</sub> deposited with different concentrations of Ni(OH)<sub>2</sub>.

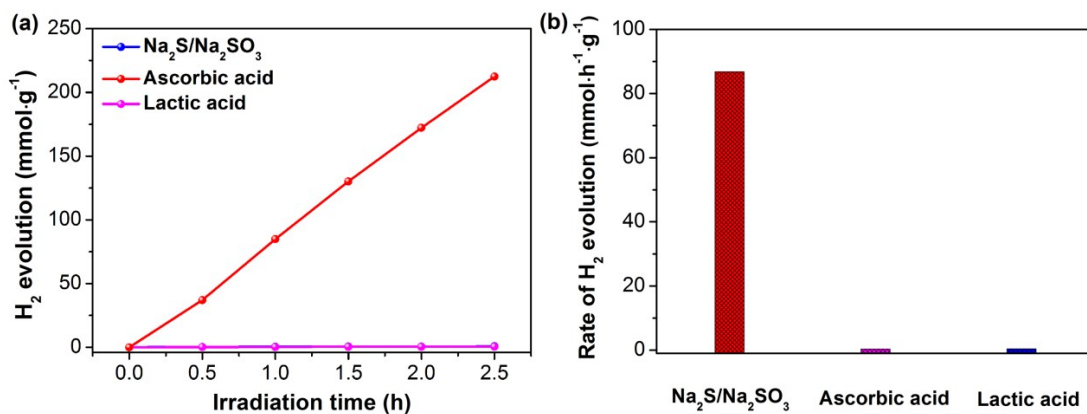

**Fig. S12.** (a) HER activities and (b) corresponding rates of the Ni-deposited CS@30CZ<sub>0.5</sub>S@40ZS measured employing different hole scavengers.

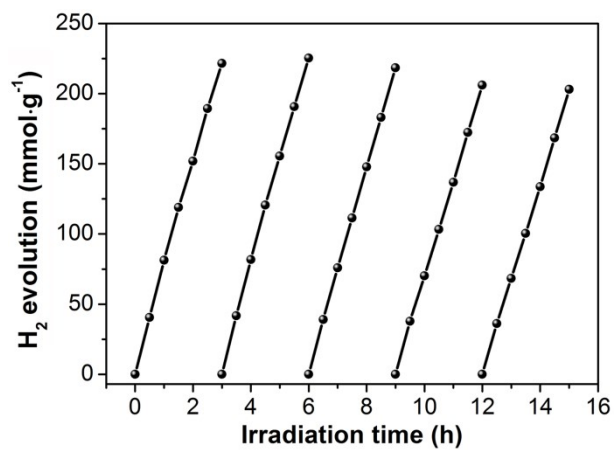

Fig. S13. Cycling HER test for the CS@30CZ<sub>0.5</sub>S@40ZS-3N composite.

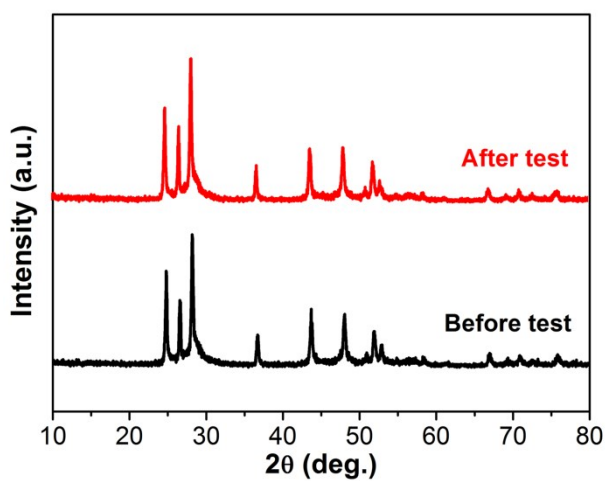

Fig. S14. XRD patterns of the CS@30CZ<sub>0.5</sub>S@40ZS-3N hybrid before and after cycling HER test.

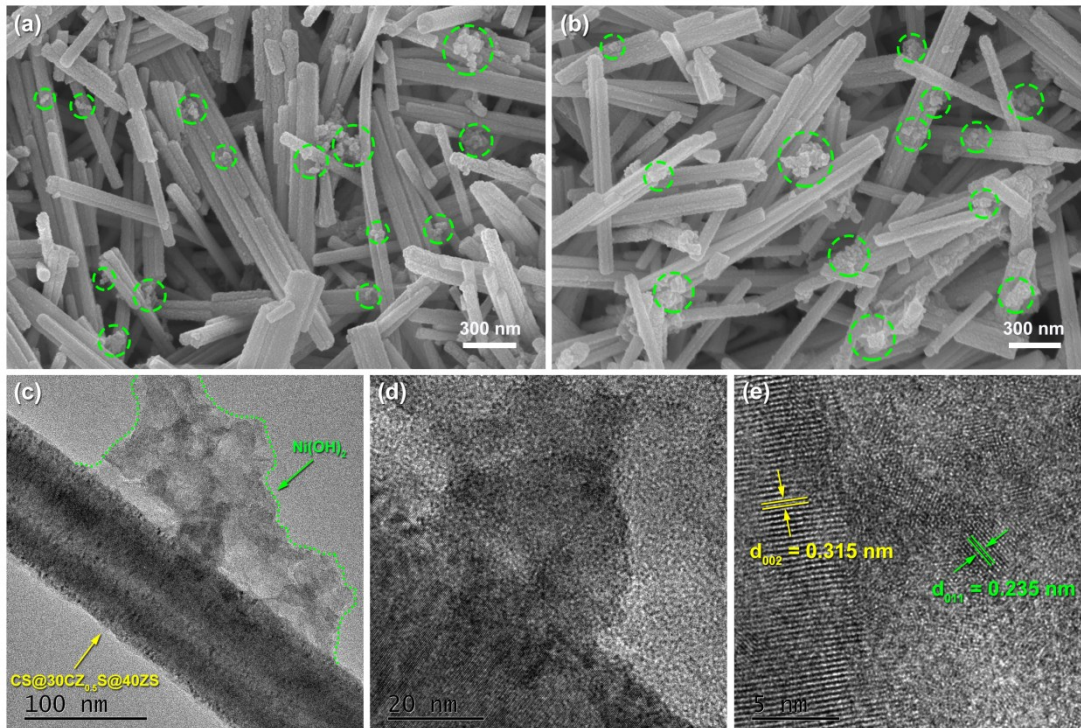

**Fig. S15.** (a, b) SEM images of the CS@30CZ<sub>0.5</sub>S@40ZS-3N composite (a) before and (b) after cycling activity test. The Ni(OH)<sub>2</sub> was indicated by the green dashed circles. (c, d) TEM and (e) HRTEM photos of the CS@30CZ<sub>0.5</sub>S@40ZS-3N hybrid after the cycling HER measurement.

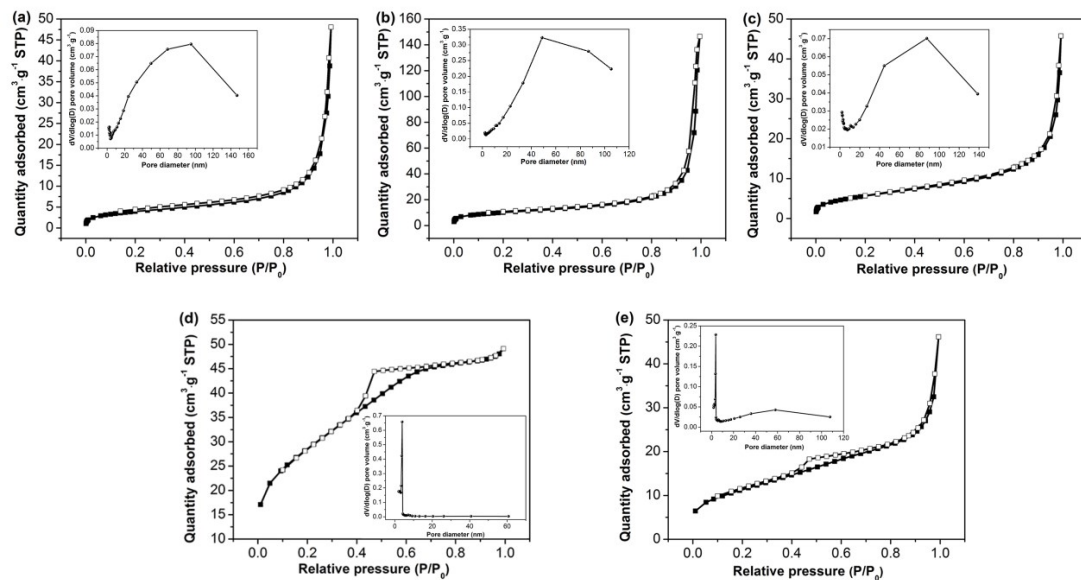

**Fig. S16.** N<sub>2</sub> adsorption-desorption isotherms and pore-size distributions of (a) CdS, (b) CZ<sub>0.5</sub>S, (c) CS@30CZ<sub>0.5</sub>S, (d) ZnS, and (e) CS@30CZ<sub>0.5</sub>S@40ZS.

**Table S2.** Comparison on the HER activities of CdS-based photocatalysts.

| Photocatalyst                                                       | Hole scavenger<br>(aqueous solution)              | Light source<br>(Xe lamp) | Maximum rate<br>(mmol·h <sup>-1</sup> ·g <sup>-1</sup> ) | AQY<br>(420 nm) | Reference |
|---------------------------------------------------------------------|---------------------------------------------------|---------------------------|----------------------------------------------------------|-----------------|-----------|
| <b>CdS@Cd<sub>0.5</sub>Zn<sub>0.5</sub>S@ZnS-Ni(OH)<sub>2</sub></b> | Na <sub>2</sub> S/Na <sub>2</sub> SO <sub>3</sub> | λ > 420 nm                | 86.79                                                    | 22.8%           | This work |
| <b>WO<sub>3</sub>-Pt-CdS</b>                                        | Na <sub>2</sub> S/Na <sub>2</sub> SO <sub>3</sub> | λ > 420 nm                | 0.39                                                     | -               | [1]       |
| <b>Cd<sub>1-x</sub>Zn<sub>x</sub>S</b>                              | Na <sub>2</sub> S/Na <sub>2</sub> SO <sub>3</sub> | λ > 420 nm                | 46.60                                                    | 6.56%           | [2]       |
| <b>CdS/NiO</b>                                                      | Methanol/NaOH                                     | λ > 400 nm                | 5.91                                                     | 8.6%            | [3]       |
| <b>CdS/ZnS</b>                                                      | Na <sub>2</sub> S/Na <sub>2</sub> SO <sub>3</sub> | λ > 420 nm                | 0.239                                                    | 16.8%           | [4]       |
| <b>Graphene-Zn<sub>x</sub>Cd<sub>1-x</sub>S</b>                     | Na <sub>2</sub> S/Na <sub>2</sub> SO <sub>3</sub> | λ > 400 nm                | 1.06                                                     | 19.8%           | [5]       |
| <b>ZnO/CdS</b>                                                      | Na <sub>2</sub> S/Na <sub>2</sub> SO <sub>3</sub> | λ > 400 nm                | 4.134                                                    | -               | [6]       |
| <b>CdS/Ni<sub>2</sub>O<sub>3</sub></b>                              | Methanol                                          | λ > 400 nm                | 4.46                                                     | -               | [7]       |
| <b>ZnS-(CdS/Pt)</b>                                                 | Na <sub>2</sub> S/Na <sub>2</sub> SO <sub>3</sub> | UV-vis light              | 5.05                                                     | -               | [8]       |
| <b>Zn<sub>x</sub>Cd<sub>1-x</sub>S/MoS<sub>2</sub></b>              | Na <sub>2</sub> S/Na <sub>2</sub> SO <sub>3</sub> | λ > 420 nm                | 0.42                                                     | -               | [9]       |
| <b>CdS@MoS<sub>2</sub></b>                                          | Lactic acid                                       | λ > 410 nm                | 26.14                                                    | -               | [10]      |
| <b>NiS/CdS</b>                                                      | Na <sub>2</sub> S/Na <sub>2</sub> SO <sub>3</sub> | λ > 420 nm                | 1.13                                                     | 6.1%            | [11]      |
| <b>CdS-ZnS</b>                                                      | Na <sub>2</sub> S/Na <sub>2</sub> SO <sub>3</sub> | λ > 420 nm                | 0.792                                                    | -               | [12]      |
| <b>Cu<sub>1.94</sub>S-Zn<sub>x</sub>Cd<sub>1-x</sub>S</b>           | Na <sub>2</sub> S/Na <sub>2</sub> SO <sub>3</sub> | λ > 420 nm                | 7.74                                                     | 8.5%            | [13]      |
| <b>Zn<sub>1-x</sub>Cd<sub>x</sub>S</b>                              | Na <sub>2</sub> S/Na <sub>2</sub> SO <sub>3</sub> | λ > 420 nm                | 7.42                                                     | 9.6%            | [14]      |
| <b>CdS/CdWO<sub>4</sub></b>                                         | Lactic acid                                       | λ > 420 nm                | 9.17                                                     | -               | [15]      |
| <b>CoO<sub>x</sub>/ZnS@CdS/Ni</b>                                   | Na <sub>2</sub> S/Na <sub>2</sub> SO <sub>3</sub> | λ > 420 nm                | 20.33                                                    | -               | [16]      |
| <b>MoS<sub>2</sub>/CdS</b>                                          | Lactic acid                                       | λ > 400 nm                | 3.85                                                     | 10.5%           | [17]      |
| <b>Cd<sub>0.5</sub>Zn<sub>0.5</sub>S(en)-NiS</b>                    | Na <sub>2</sub> S/Na <sub>2</sub> SO <sub>3</sub> | λ > 420 nm                | 38.2                                                     | -               | [18]      |
| <b>Ni<sub>2</sub>P/Zn<sub>0.5</sub>Cd<sub>0.5</sub>S</b>            | Na <sub>2</sub> S/Na <sub>2</sub> SO <sub>3</sub> | λ > 420 nm                | 22                                                       | -               | [19]      |
| <b>NiS/CDs/CdS</b>                                                  | Na <sub>2</sub> S/Na <sub>2</sub> SO <sub>3</sub> | λ > 420 nm                | 1.44                                                     | -               | [20]      |

**Table S3.** BET surface areas of different samples.

| Catalyst                                            | CdS   | CZ <sub>0.5</sub> S | ZnS    | CS@30CZ <sub>0.5</sub> S | CS@30CZ <sub>0.5</sub> S@40ZS |
|-----------------------------------------------------|-------|---------------------|--------|--------------------------|-------------------------------|
| S <sub>BET</sub> (m <sup>2</sup> ·g <sup>-1</sup> ) | 14.37 | 35.87               | 100.36 | 20.72                    | 40.66                         |

#### References:

- [1] M. S. Akple and S. P. Chimmikuttanda, *J. Nanopart. Res.*, 2018, **20**, 231.
- [2] J. Song, H. Zhao, R. Sun, X. Li and D. Sun, *Energy Environ. Sci.*, 2017, **10**, 225-235.
- [3] X. Chen, W. Chen, H. Gao, Y. Yang and W. Shanguan, *Appl. Catal. B*, 2014, **152-153**, 68-72.
- [4] D. Jiang, Z. Sun, H. Jia, D. Lu and P. Du, *J. Mater. Chem. A.*, 2016, **4**, 675-683.
- [5] Q. Li, H. Meng, J. Yu, W. Xiao, Y. Zheng and J. Wang, *Chem. Eur. J.*, 2014, **20**, 1176-1185.
- [6] S. Wang, B. Zhu, M. Liu, L. Zhang, J. Yu and M. Zhou, *Appl. Catal. B*, 2019, **243**, 19-26.



- [7] X. Chen, W. Chen, P. Lin, Y. Yang, H. Gao, J. Yuan and W. Shangguan, *Catal. Commun.*, 2013, **36**, 104-108.
- [8] T. Zhuang, Y. Liu, M. Sun, S. Jiang, M. Zhang, X. Wang, Q. Zhang, J. Jiang and S. Yu, *Angew. Chem. Int. Ed.*, 2015, **54**, 11495-11500.
- [9] M. Nguyen, P. D. Tran, S. S. Pramana, R. L. Lee, S. K. Batabyal, N. Mathews, L. H. Wong and M. Graetzel, *Nanoscale*, 2013, **5**, 1479-1482.
- [10] Y. Yang, Y. Zhang, Z. Fang, L. Zhang, Z. Zheng, Z. Wang, W. Feng, S. Weng, S. Zhang and P. Liu, *ACS Appl. Mater. Interfaces.*, 2017, **9**, 6950-6958.
- [11] J. Zhang, S. Qiao, L. Qi and J. Yu, *Phys. Chem. Chem. Phys.*, 2013, **15**, 12088-12094.
- [12] Y. Xie, Z. Yu, G. Liu, X. Ma and H. Cheng, *Energy Environ. Sci.*, 2014, **7**, 1895-1901.
- [13] Y. Chen, S. Zhao, X. Wang, Q. Peng, R. Lin, Y. Wang, R. Shen, X. Cao, L. Zhang, G. Zhou, J. Li, A. Xia and Y. Li, *J. Am. Chem. Soc.*, 2016, **138**, 4286-4289.
- [14] Q. Li, H. Meng, P. Zhou, Y. Zheng, J. Wang, J. Yu and J. Gong, *ACS Catal.*, 2013, **3**, 882-889.
- [15] X. Jia, M. Tahir, L. Pan, Z. Huang, X. Zhang, L. Wang and J. Zou, *Appl. Catal., B*, 2016, **198**, 154-161.
- [16] L. Zhang, S. Li, B. Liu, D. Wang and T. Xie, *ACS Catal.*, 2014, **4**, 3724-3729.
- [17] J. Zhang, Z. Zhu, and X. Feng, *Chem. Eur. J.*, 2014, **20**, 10632-10635.
- [18] M. Chen, P. Wu, Y. Zhu, S. Yang, Y. Lu and Z. Lin, *Int. J. Hydrogen Energy.*, 2018, **43**, 10938-10949.
- [19] D. Dai, L. Wang, N. Xiao, S. Li, H. Xu, S. Liu, B. Xu, D. Lv, Y. Gao, W. Song, L. Ge and J. Liu, *Appl. Catal., B*, 2018, **233**, 194-201.
- [20] R. Wei, Z. Huang, G. Gao, Z. Wang, L. Zeng, Y. Chen and Z. Liu, *Appl. Catal., B*, 2018, **231**, 101-107.
